# Supplementary material
Source: bioRxiv or medRxiv preprint supplement (https://www.biorxiv.org/highwire/filestream/18053/field_highwire_adjunct_files/0/062950-1.pdf)
Supplement: Supplementary file [file 062950-1.pdf]

# Genome-wide Variants of Eurasian Facial Shape Differentiation and DNA based Face Prediction

Lu Qiao<sup>1,2</sup>, Yajun Yang<sup>3,4</sup>, Pengcheng Fu<sup>5</sup>, Sile Hu<sup>1,2</sup>, Hang Zhou<sup>1,2</sup>, Jingze Tan<sup>3,4</sup>, Yan Lu<sup>1</sup>, Haiyi Lou<sup>1</sup>, Dongsheng Lu<sup>1,2</sup>, Sijie Wu<sup>1,2</sup>, Jing Guo<sup>1</sup>, Shouneng Peng<sup>1,2</sup>, Li Jin<sup>1,2,3,4,7</sup>, Yaqun Guan<sup>6</sup>, Sijia Wang<sup>1,2,7,\*</sup>, Shuhua Xu<sup>1,2,7,8,\*</sup> & Kun Tang<sup>1,2,\*</sup>

<sup>1</sup> Chinese Academy of Sciences (CAS) Laboratory of Computational Biology, CAS-MPG Partner Institute for Computational Biology, Shanghai Institutes for Biological Sciences, Chinese Academy of Science, Shanghai 200031, China;

<sup>2</sup>University of Chinese Academy of Sciences, Beijing 100049, China;

<sup>3</sup>State Key Laboratory of Genetic Engineering and Ministry of Education Key Laboratory of Contemporary Anthropology, School of Life Sciences, Fudan University, Shanghai 200433, China;

<sup>3</sup>Fudan-Taizhou Institute of Health Sciences, 1 Yaocheng Road, Taizhou, Jiangsu 225300, China;

<sup>5</sup>Department of neurology, the First People's Hospital of Chenzhou, Hunan, 423000, China;

<sup>6</sup>Department of Biochemistry and Molecular Biology, Preclinical Medicine College, Xinjiang Medical University, Urumqi 830011, P. R China;

<sup>7</sup>Collaborative Innovation Center of Genetics and Development, Shanghai 200438, China;

<sup>8</sup>School of Life Science and Technology, ShanghaiTech University, Shanghai 200031, China.

\*Correspondence could be addressed to K.T. ([tangkun@picb.ac.cn](mailto:tangkun@picb.ac.cn)), S.X. ([xushua@picb.ac.cn](mailto:xushua@picb.ac.cn)), S.W. ([wangsijia@picb.ac.cn](mailto:wangsijia@picb.ac.cn)),

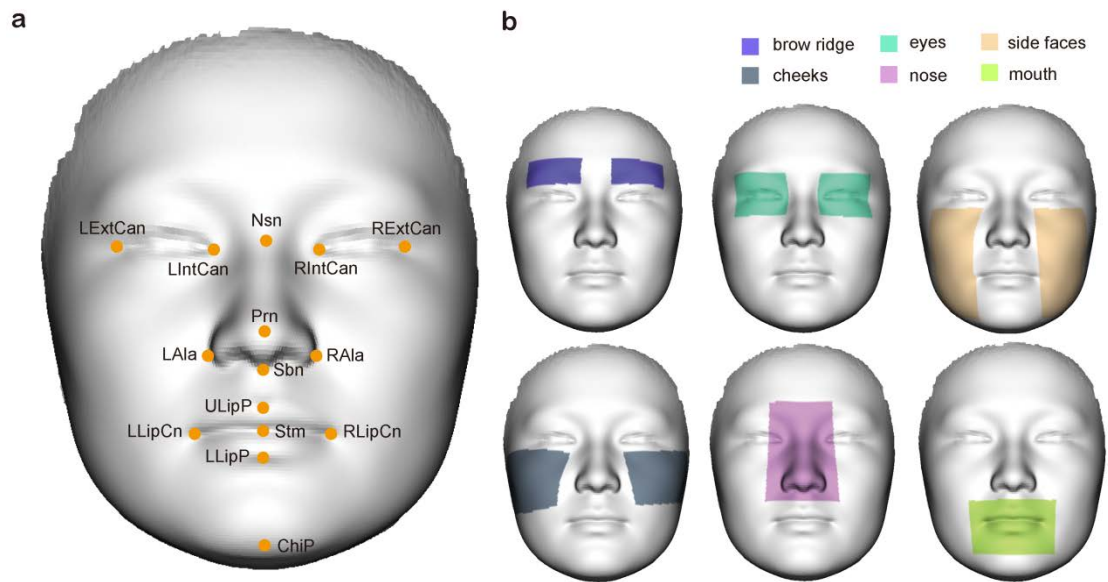

**Supplementary Figure 1 | The 15 landmarks and facial features extracted from 3D images.** (a) the annotation of the fifteen landmarks. (b) the extraction of six facial features on the 3dDFM data.

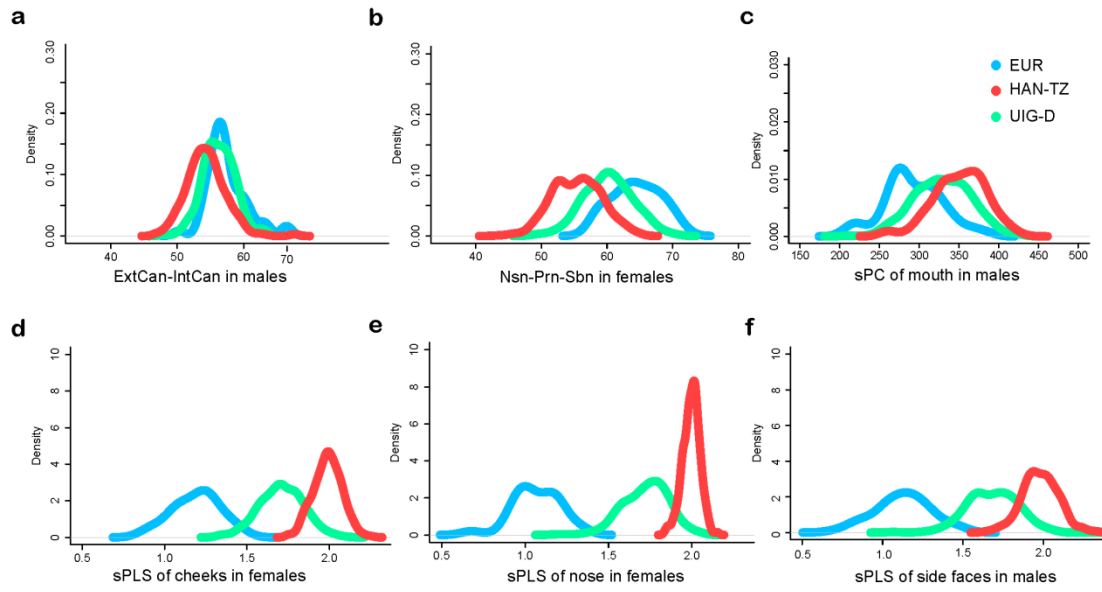

**Supplementary Figure 2 | Examples of candidate phenotypes showing high divergence between EUR and HAN-TZ.** (a) distance of ExtCan-IntCan in males, (b) distance of Nsn-Prn-Sbn in females, (c) sPC of mouth in males, (d) sPLS of cheek in females, (e) nasal sPLS in females, (f) sPLS of side faces in males.

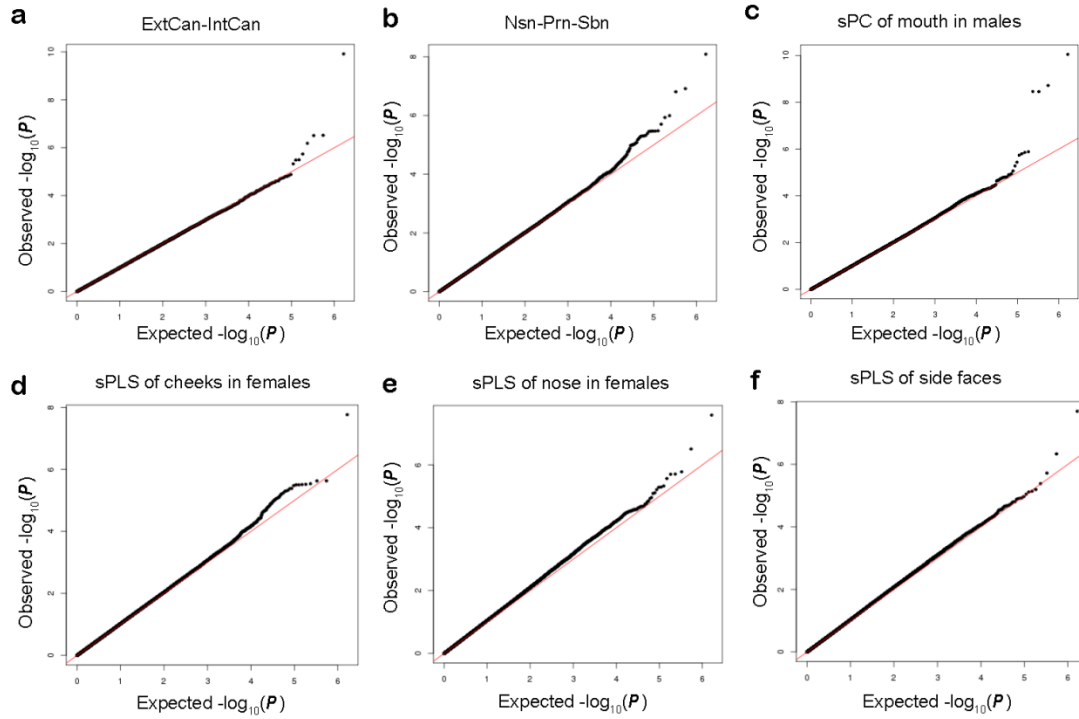

**Supplementary Figure 3 | Q-Q plot of GWAS showing six genome-wide significant SNPs. (a) rs1868752, (b) rs118078182, (c) rs60159418, (d) rs17868256, (e) rs3920540, (f) rs61672954.**

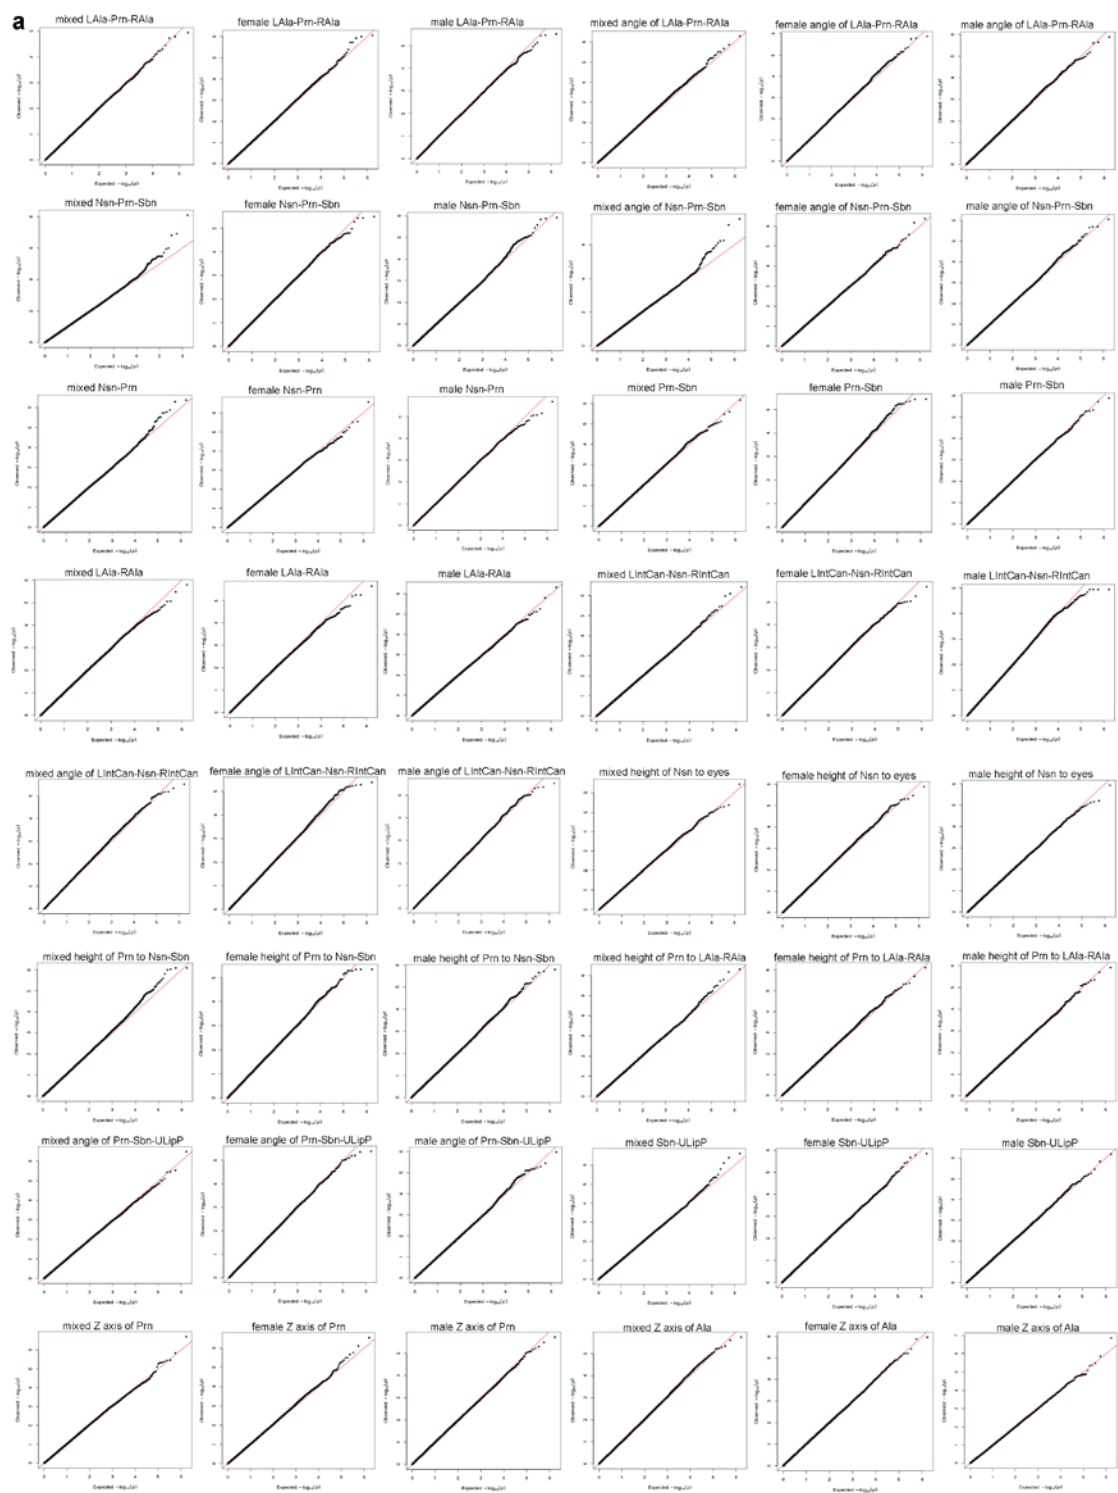

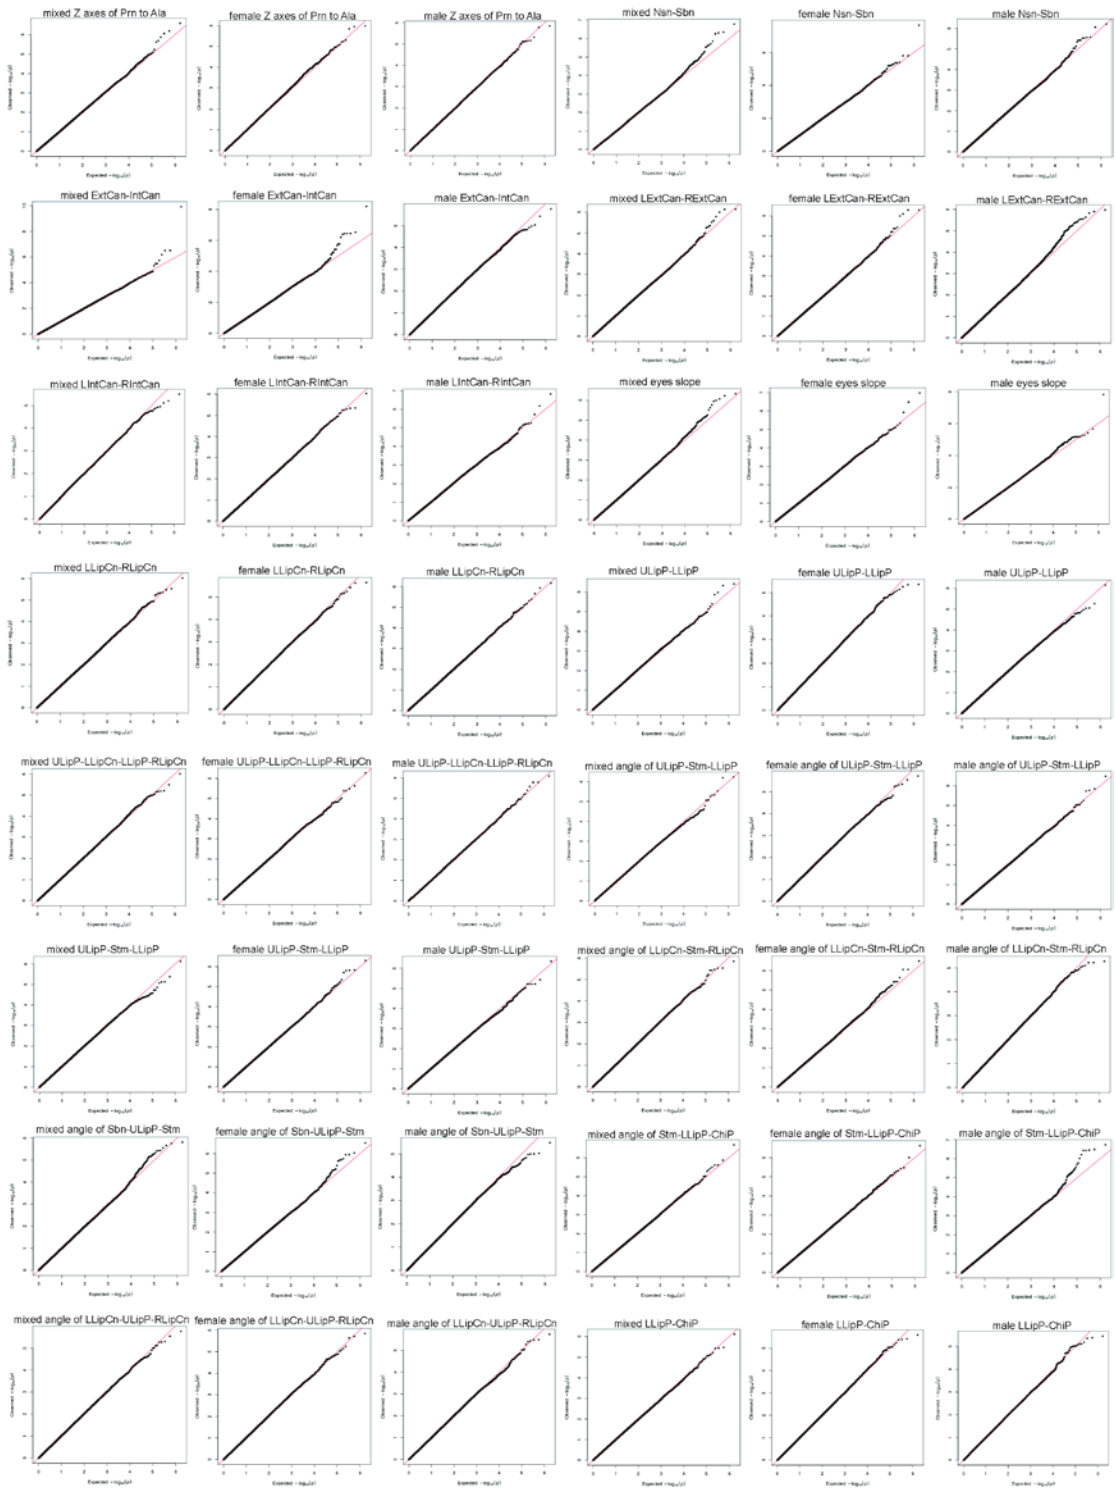

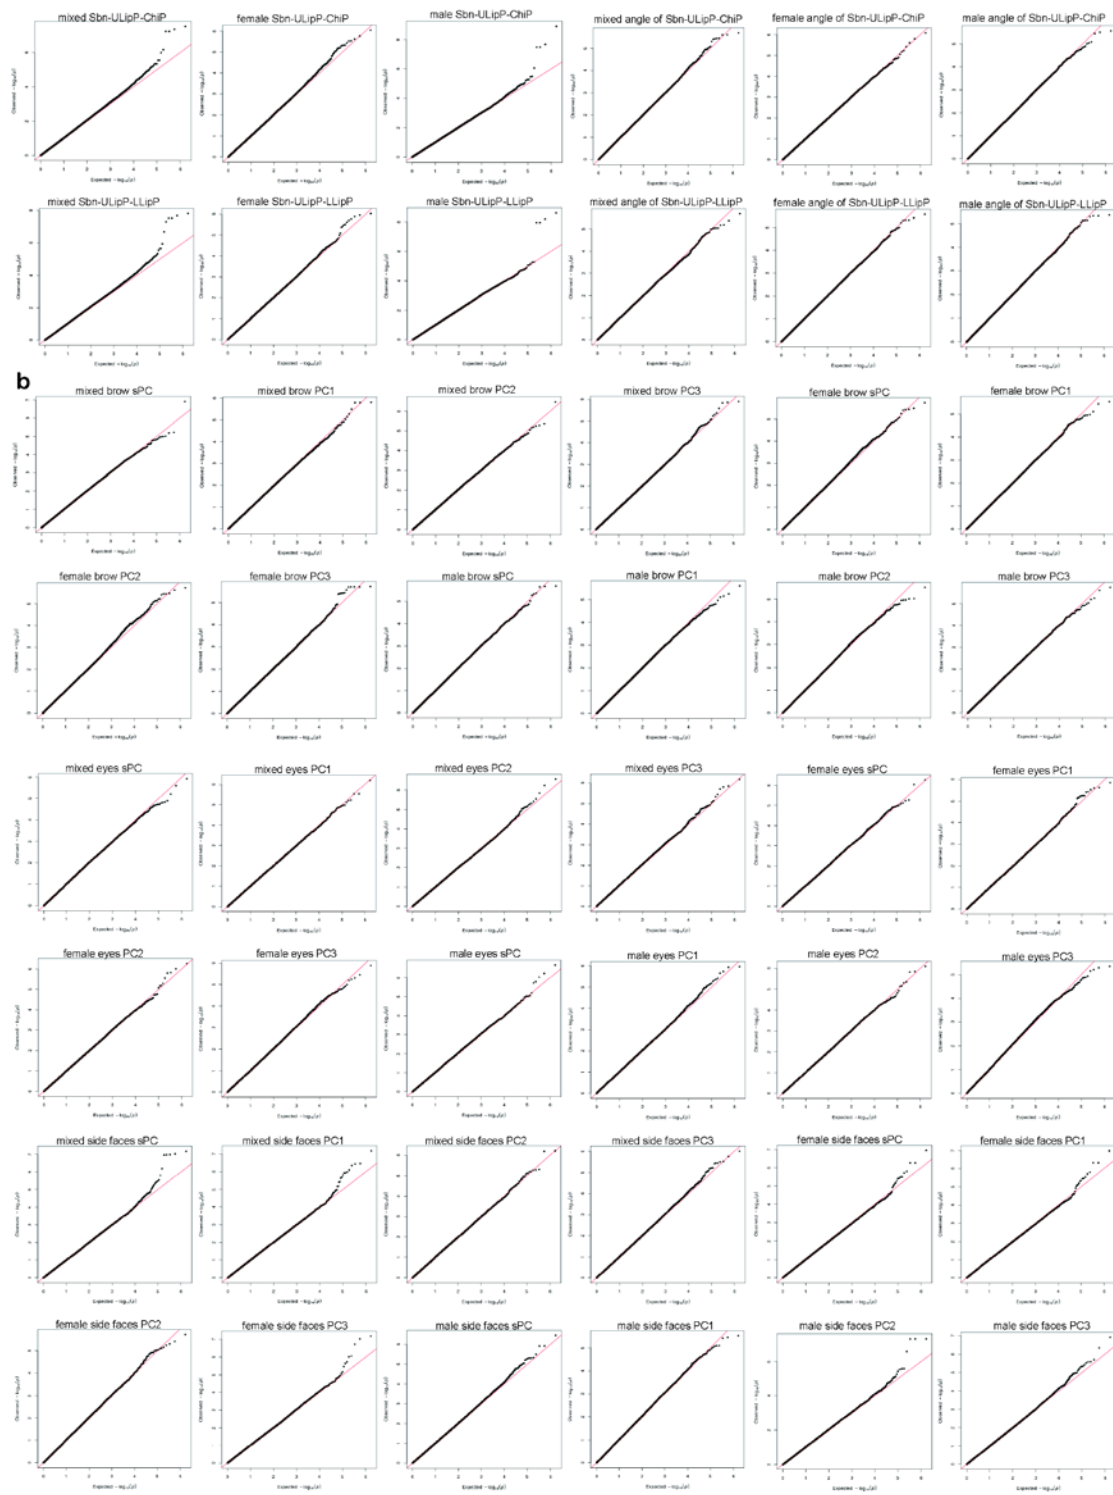

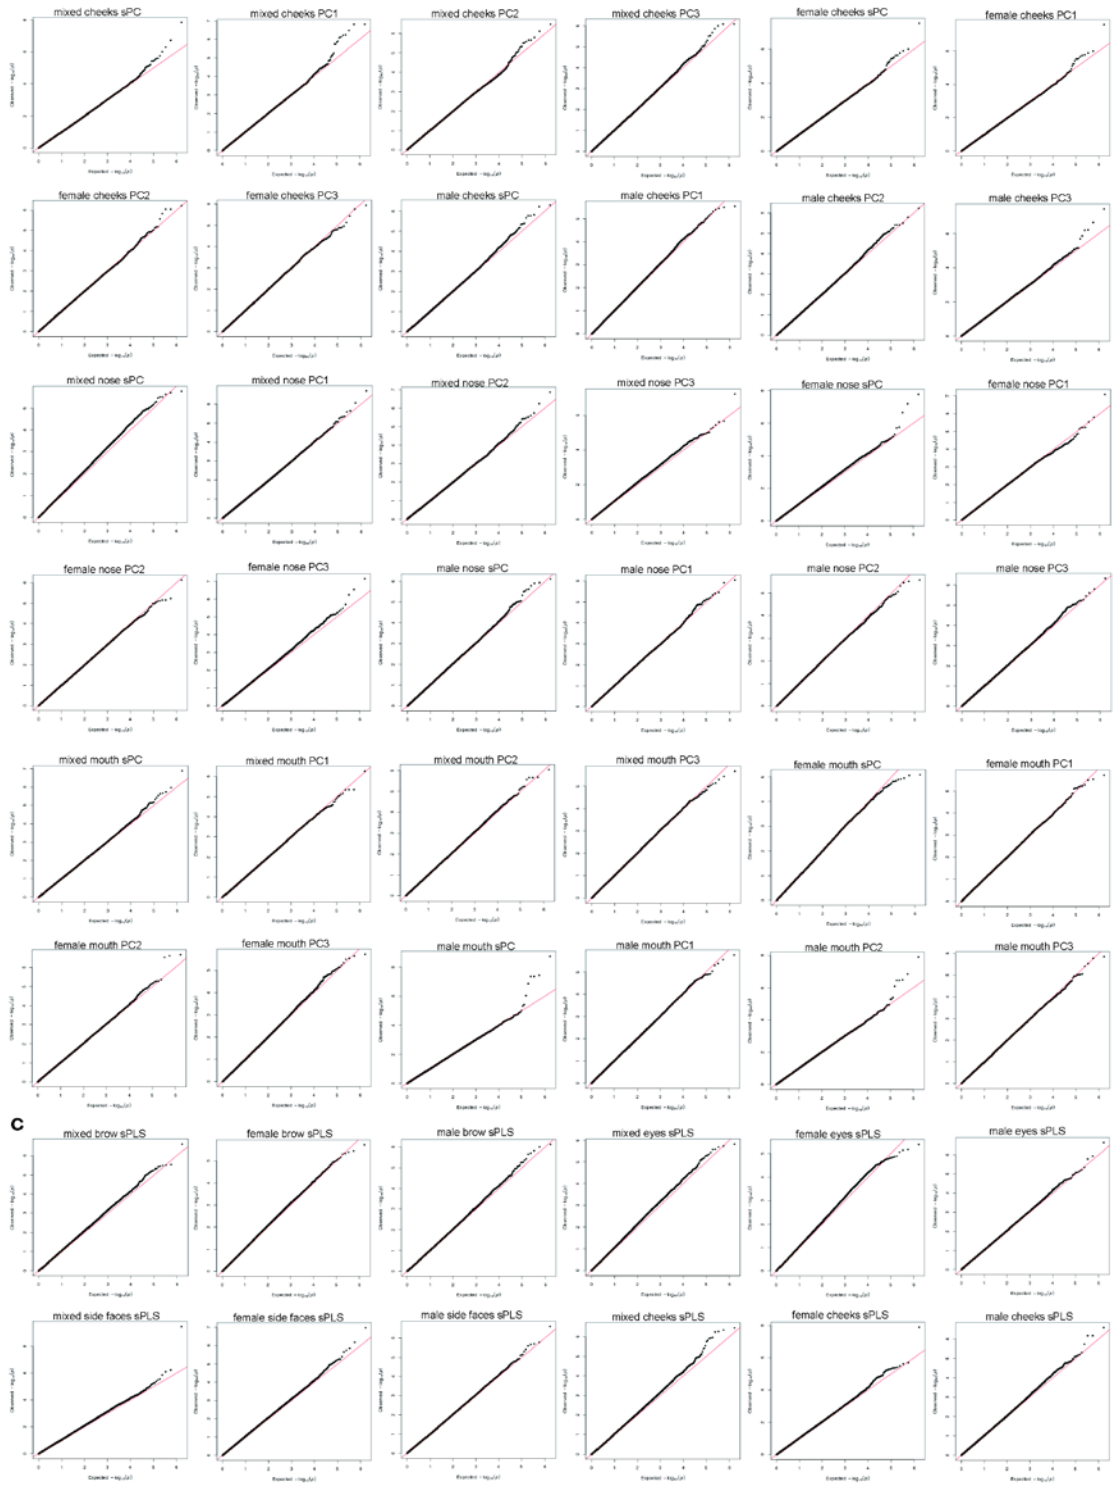



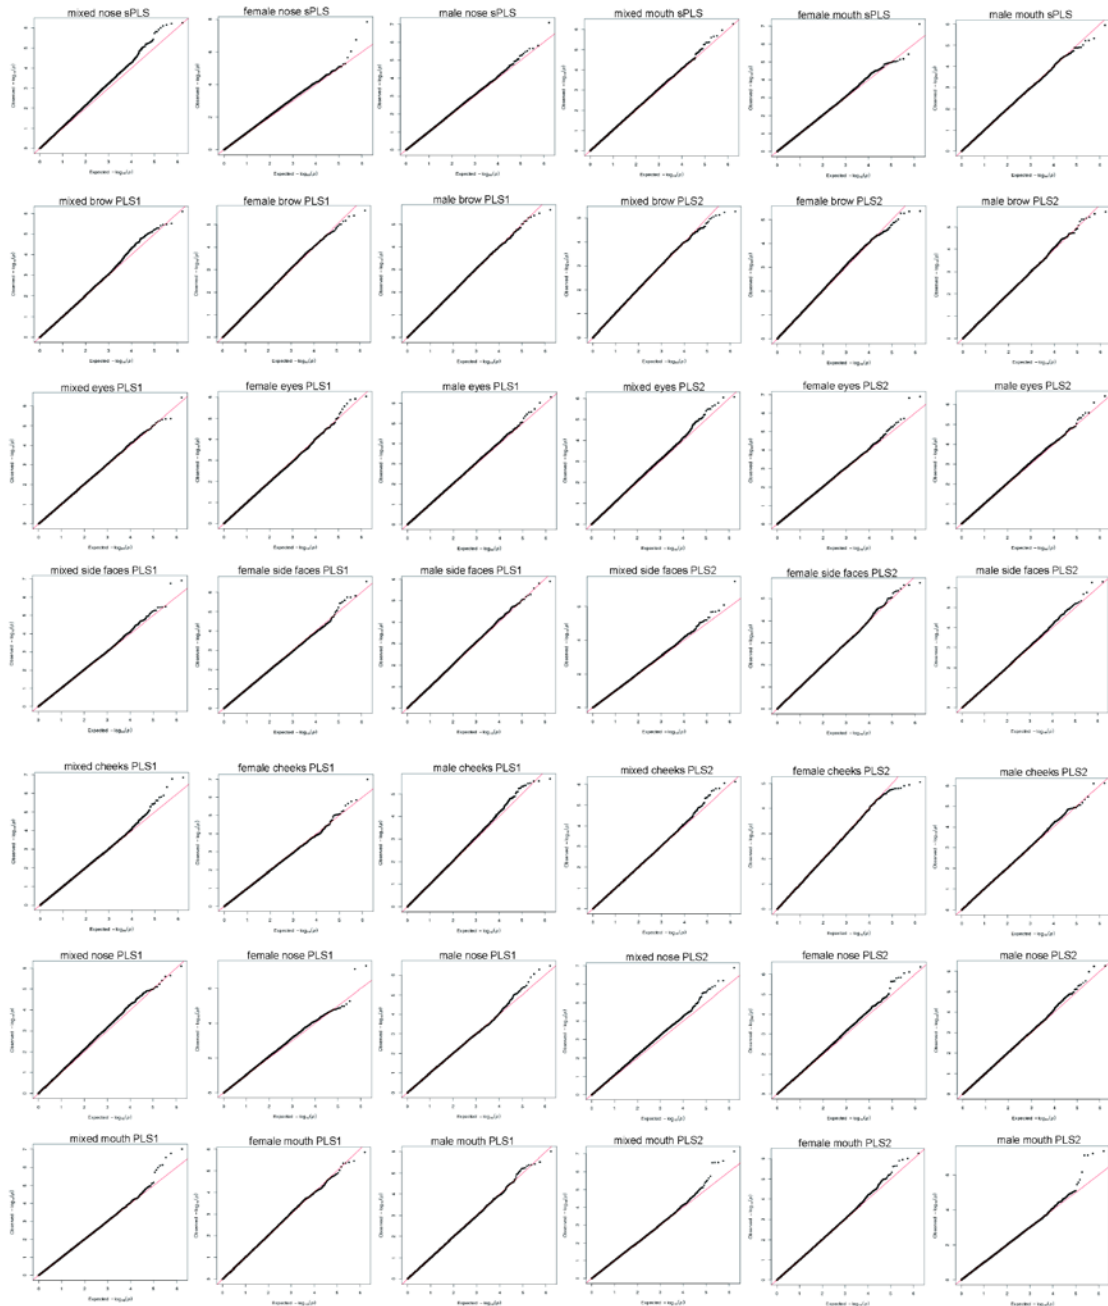

**Supplementary Figure 4 | Q-Q plot of all GWAS.** (a) inter-landmark phenotyping GWAS, (b) PCA-based phenotyping GWAS, (c) PLS-based phenotyping GWAS.

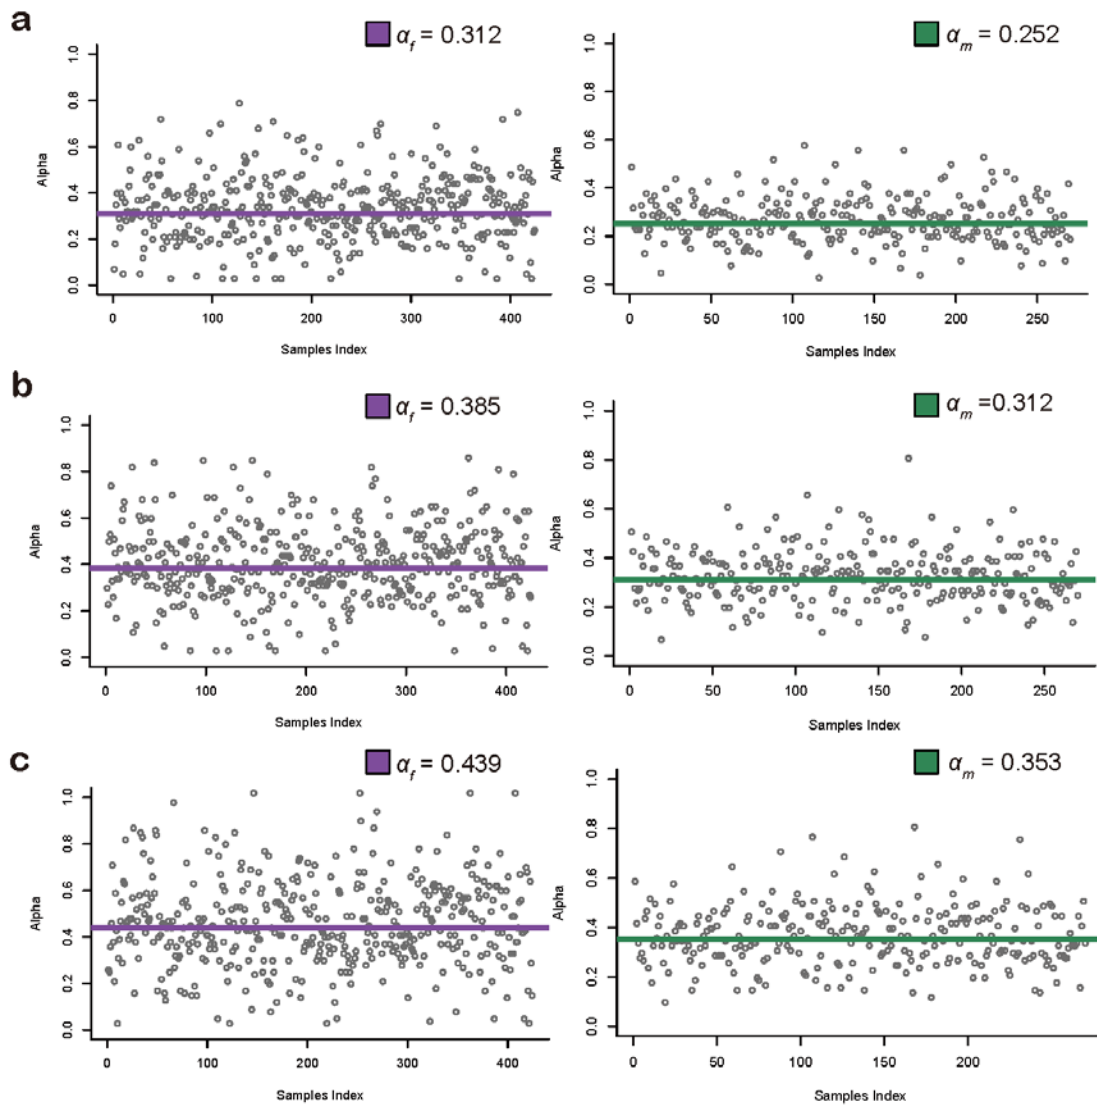

**Supplementary Figure 5 | Global effect coefficient  $\alpha_f$  and  $\alpha_m$  from UIG-D females and UIG-D males.** The coefficient  $\alpha$  was plotted respectively for (a) the full prediction model of 277 top SNPs; (b) the prediction model of 240 top-SNPs after trimming the SNPs of pairwise LD  $> 0.8$ . (c) the prediction model of 209 top-SNPs after trimming SNPs within a physical distance of  $< 400\text{kb}$ . The global coefficient was obtained by averaging over all individuals.

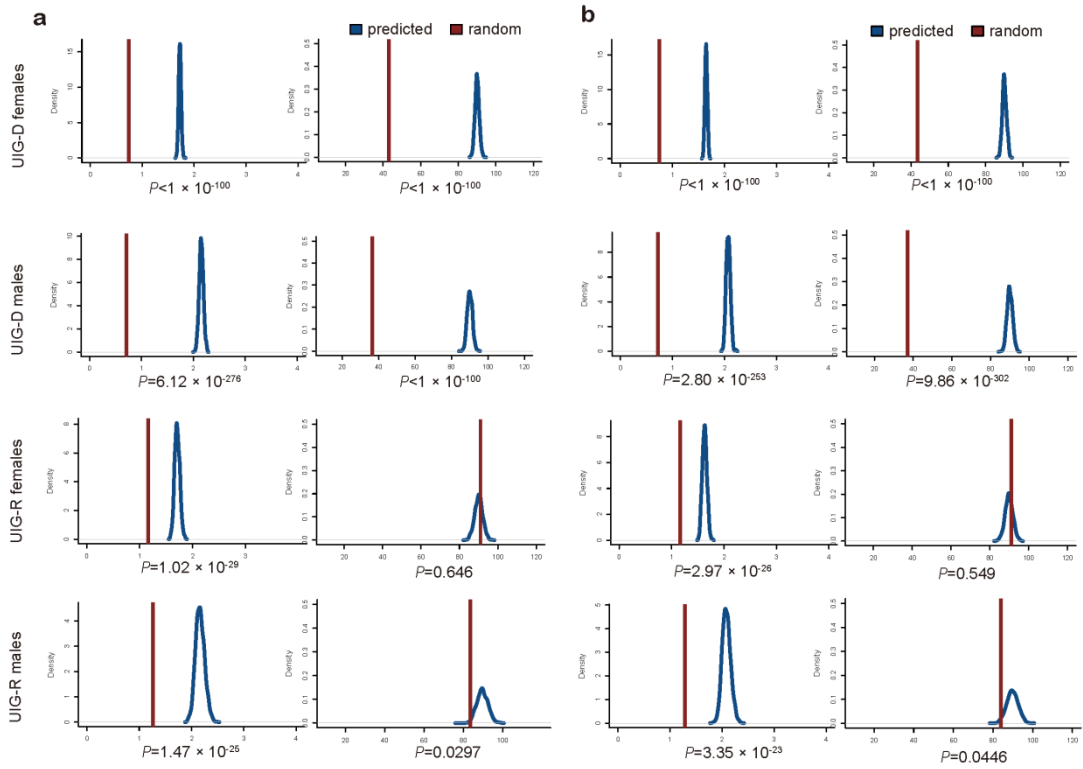

**Supplementary Figure 6 | Test of prediction model using 240-SNP and 209-SNP prediction models.** For the (a) 240-SNP prediction model, and (b) 209-SNP prediction model, the average PSD (left column) and SSA (right column) determined for the sample cohorts (in red) were compared to the random distributions under null hypothesis (in blue).

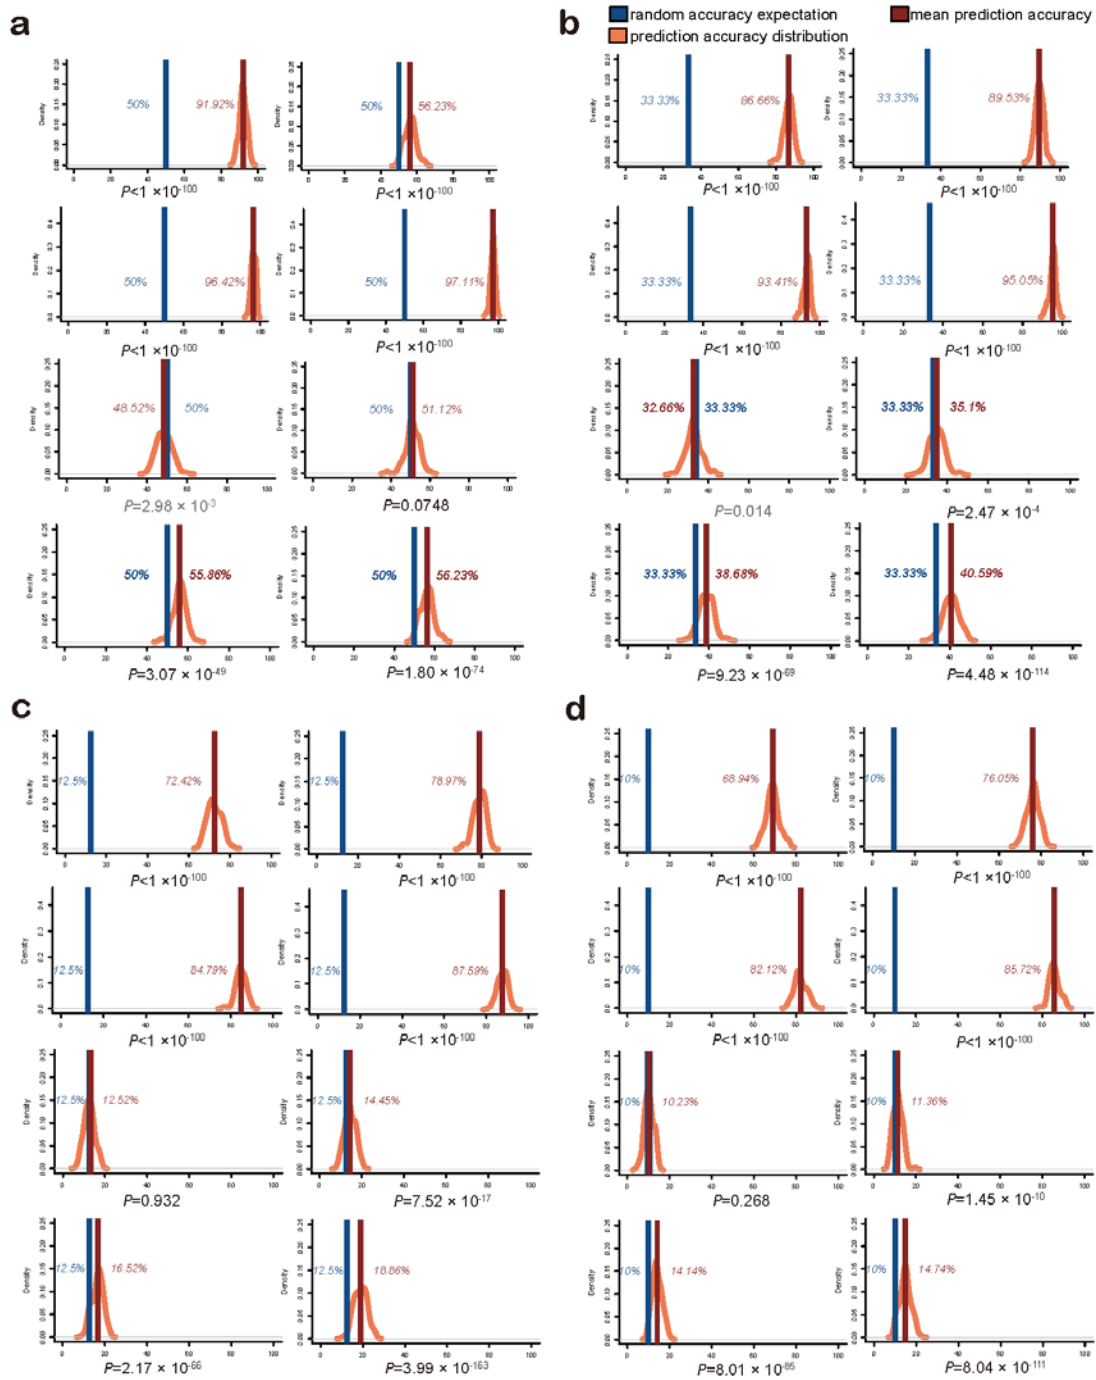

**Supplementary Figure 7 | Evaluation of the face prediction in hypothetical forensic scenarios (2/3/8/10 candidates) using 277-SNP face prediction model.** (a) N=2, (b) N=3, (c) N=8, (d) N=10. In each scenario, the samples from top row to bottom are UIG-D females, UIG-D males, UIG-R females, UIG-R males. For each cohort, the accuracy rates are decided based on PSD (left column) and SSA (right column). *P* values in black indicate that the prediction perform significantly better than random draws.

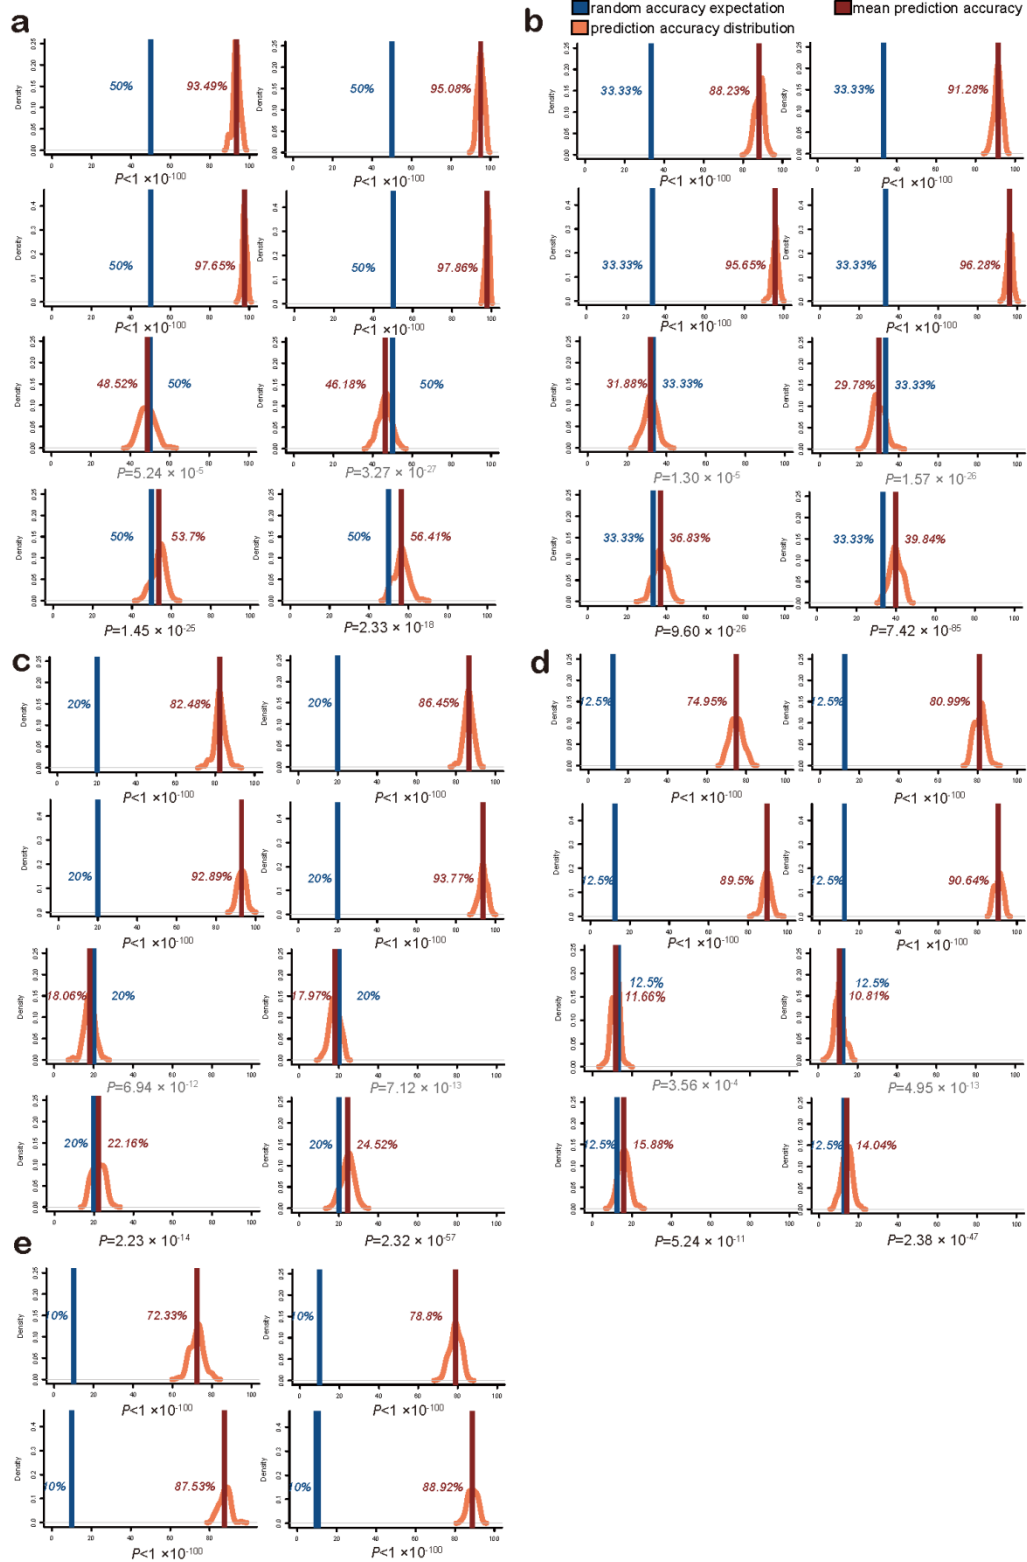

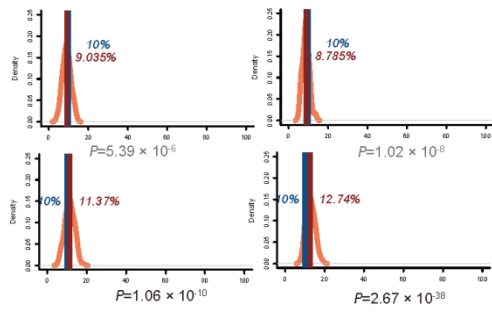

**Supplementary Figure 8 | Evaluation of the face prediction in hypothetic forensic scenarios (2/3/5/8/10 candidates) using 240-SNP face prediction model.** (a) N=2, (b) N=3, (c) N=5, (d) N=8, (e) N=10. In each scenario, the samples from top row to bottom are UIG-D females, UIG-D males, UIG-R females, UIG-R males. For each cohort, the accuracy rates are decided based on PSD (left column) and SSA (right column). *P* values in black indicate that the prediction perform significantly better than random draws.

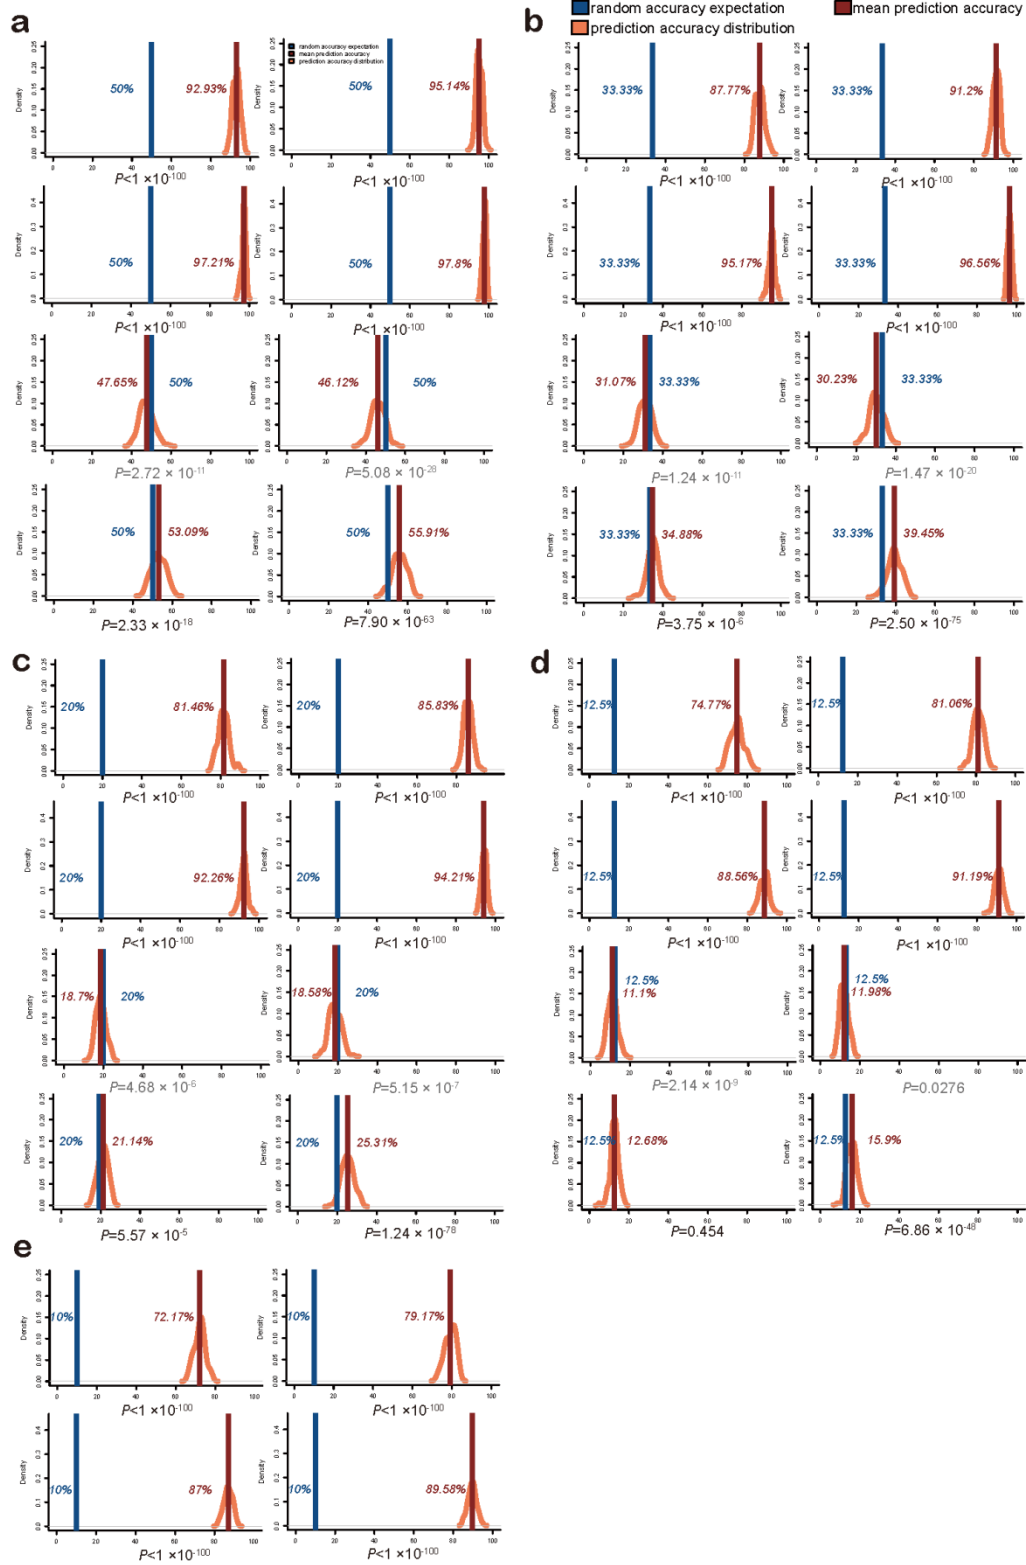

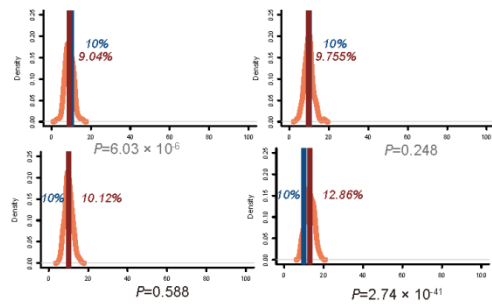

**Supplementary Figure 9 | Evaluation of the face prediction in hypothetic forensic scenarios (2/3/5/8/10 candidates) using 209-SNP face prediction model.** (a) N=2, (b) N=3, (c) N=5, (d) N=8, (e) N=10. In each scenario, the samples from top row to bottom are UIG-D females, UIG-D males, UIG-R females, UIG-R males. For each cohort, the accuracy rates are decided based on PSD (left column) and SSA (right column). *P* values in black indicate that the prediction perform significantly better than random draws.



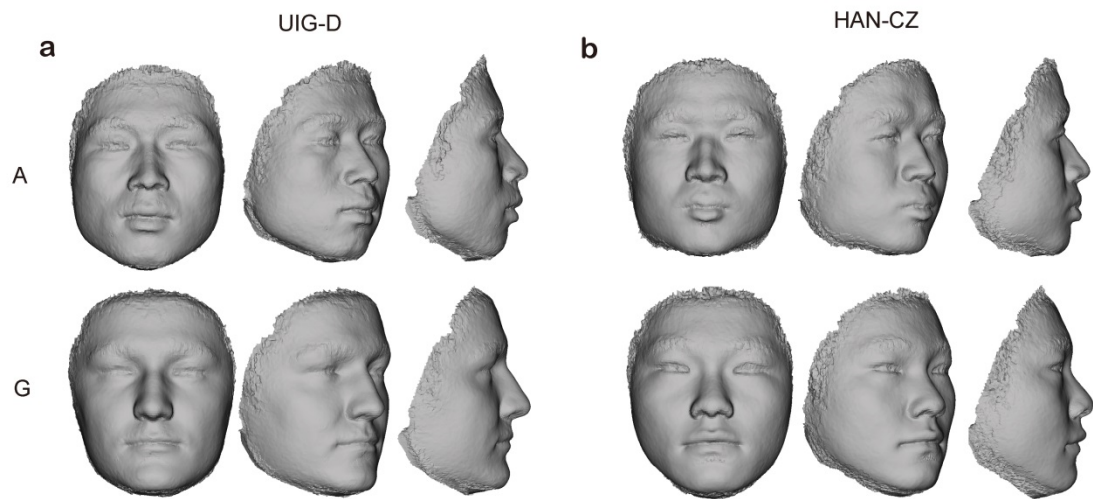

**Supplementary Figure 10 | Extrapolated faces of rs61672954 in discovery and independent cohorts.** (a) in UIG-D males, (b) in HAN-CZ males. We showed the extreme faces based on residual faces with their allele labeled in front. The top extrapolated faces and alleles are corresponding to Han Chinese liked faces. The bottom extrapolations are European liked faces.

**Supplementary Movie 1 | 3D visualization of extrapolated face affected by rs1868752.** The animation show the extreme facial shape change from Han-trend to European-trend affected by rs1868752. (a) anterior view, (b) cant view, (c) lateral view.

**Supplementary Movie 2 | 3D visualization of extrapolated face affected by rs118078182.** The animation show the extreme facial shape change from Han-trend to European-trend affected by rs118078182. (a) anterior view, (b) cant view, (c) lateral view.

**Supplementary Movie 3 | 3D visualization of extrapolated face affected by rs60159418.** The animation show the extreme facial shape change from Han-trend to European-trend affected by rs60159418. (a) anterior view, (b) cant view, (c) lateral view.

**Supplementary Movie 4 | 3D visualization of extrapolated face affected by rs17868256.** The animation show the extreme facial shape change from Han-trend to European-trend affected by rs17868256. (a) anterior view, (b) cant view, (c) lateral view.

**Supplementary Movie 5 | 3D visualization of extrapolated face affected by rs3920540.** The animation show the extreme facial shape change from Han-trend to European-trend affected by rs3920540. (a) anterior view, (b) cant view, (c) lateral view.

**Supplementary Movie 6 | 3D visualization of extrapolated face affected by rs61672954.** The animation show the extreme facial shape change from Han-trend to European-trend affected by rs61672954. (a) anterior view, (b) cant view, (c) lateral view.

**Supplementary Movie 7 | 3D visualization of actual face and predicted face.** cases of visualization of actual face (left column) and predicted face (right column). (a) case from UIG-D female, (b) case from UIG-D male, (c) case from UIG-R female, (d) case from UIG-R male.

**Supplementary Table 1 | Landmark-based phenotypes**

| Landmrk-based phenotypes | P                      |                        |
|--------------------------|------------------------|------------------------|
|                          | Female                 | Male                   |
| LAla-Prn-RAla            | $2.70 \times 10^{-11}$ | $1.52 \times 10^{-21}$ |
| Nsn-Prn-Sbn              | $2.43 \times 10^{-15}$ | $6.71 \times 10^{-23}$ |
| LIntCan-Nsn-RIntCan      | $2.38 \times 10^{-10}$ | $5.27 \times 10^{-27}$ |
| height of Nsn to eyes    | $1.22 \times 10^{-21}$ | $5.50 \times 10^{-47}$ |
| Sbn-ULipP                | $3.28 \times 10^{-8}$  | $2.80 \times 10^{-9}$  |
| LLipCn-RLipCn            | <b>0.00535</b>         | $1.52 \times 10^{-8}$  |
| ULipP-Stm-LLipP          | <b>0.0026</b>          | $7.41 \times 10^{-9}$  |
| ExtCan-IntCan            | $1.46 \times 10^{-7}$  | $2.58 \times 10^{-10}$ |
| LIntCan-RIntCan          | $8.69 \times 10^{-7}$  | $4.31 \times 10^{-9}$  |
| Sbn-ULipP-ChiP           | <b>0.00359</b>         | $6.78 \times 10^{-7}$  |

**Supplementary Table 2 | Eurasian-specified phenotypes**

| Partial Features | Gender <sup>A</sup> | PCA based           |                        | PLS based           |                        |
|------------------|---------------------|---------------------|------------------------|---------------------|------------------------|
|                  |                     | ncomp. <sup>B</sup> | P <sup>C</sup>         | ncomp. <sup>B</sup> | P <sup>C</sup>         |
| brow ridge       | Female              | 2                   | $5.80 \times 10^{-19}$ | 1:6                 | $6.41 \times 10^{-23}$ |
|                  | Male                | 2                   | $1.00 \times 10^{-29}$ | 1:8                 | $2.78 \times 10^{-49}$ |
| eyes             | Female              | 5                   | $1.69 \times 10^{-16}$ | 1:8                 | $1.45 \times 10^{-25}$ |
|                  | Male                | 2                   | $8.62 \times 10^{-17}$ | 1:11                | $1.00 \times 10^{-60}$ |
| side faces       | Female              | 1                   | $5.79 \times 10^{-13}$ | 1:25                | $6.48 \times 10^{-27}$ |
|                  | Male                | 2                   | $1.71 \times 10^{-17}$ | 1:9                 | $1.94 \times 10^{-47}$ |
| cheeks           | Female              | 1                   | $4.71 \times 10^{-15}$ | 1:22                | $1.10 \times 10^{-27}$ |
|                  | Male                | 2                   | $5.79 \times 10^{-21}$ | 1:8                 | $4.03 \times 10^{-43}$ |
| nose             | Female              | 2                   | $1.43 \times 10^{-22}$ | 1:17                | $2.94 \times 10^{-29}$ |
|                  | Male                | 2                   | $2.24 \times 10^{-46}$ | 1:12                | $6.09 \times 10^{-57}$ |
| mouth            | Female              | 4                   | $3.41 \times 10^{-11}$ | 1:20                | $1.85 \times 10^{-24}$ |
|                  | Male                | 2                   | $8.73 \times 10^{-18}$ | 1:15                | $1.72 \times 10^{-48}$ |

<sup>A</sup>sex specified test

<sup>B</sup>Number of components that used to distinguish Han Chinese and European features

<sup>C</sup>Student's test

**Supplementary Table 3 | Inflation factor in GWAS**

| <b>SNP</b>  | <b>P</b>                                 | <b>Inflation factor</b> | <b>genome PC corrected<br/>P values</b>  | <b>genome PC corrected<br/>Inflation factor</b> |
|-------------|------------------------------------------|-------------------------|------------------------------------------|-------------------------------------------------|
| rs1868752   | <b><math>1.22 \times 10^{-10}</math></b> | 1                       | <b><math>1.02 \times 10^{-10}</math></b> | 1                                               |
| rs118078182 | <b><math>8.19 \times 10^{-9}</math></b>  | 1.00961                 | <b><math>1.09 \times 10^{-8}</math></b>  | 1.01032                                         |
| rs60159418  | <b><math>8.96 \times 10^{-11}</math></b> | 1.01437                 | <b><math>1.38 \times 10^{-9}</math></b>  | 1                                               |
| rs17868256  | <b><math>7.22 \times 10^{-9}</math></b>  | 1.03422                 | <b><math>1.20 \times 10^{-7}</math></b>  | 1.0013                                          |
| rs3920540   | <b><math>3.31 \times 10^{-8}</math></b>  | 1.06986                 | <b><math>2.28 \times 10^{-7}</math></b>  | 1.00707                                         |
| rs61672954  | <b><math>2.00 \times 10^{-8}</math></b>  | 1.03794                 | <b><math>1.04 \times 10^{-7}</math></b>  | 1                                               |

Supplementary Table 4 | Previous candidate SNPs associated with Uyghur facial shape

| SNP        | Chr. | BP <sup>A</sup> | Gene         | Discovered Trait <sup>B</sup>                        | Studied Trait                | P               |                 |                 |
|------------|------|-----------------|--------------|------------------------------------------------------|------------------------------|-----------------|-----------------|-----------------|
|            |      |                 |              |                                                      |                              | Female          | Male            | Mixed           |
| rs4648379  | 1    | 3261516         | PRDM16       | LAla-Prn-RAla                                        | LAla-Prn-RAla                | 0.7133          | 0.172           | 0.2357          |
|            |      |                 |              |                                                      | angle of LAla-Prn-Rala       | 0.2207          | <b>0.02539</b>  | <b>0.02028</b>  |
| rs642961   | 1    | 209989270       | IRF6         | ULipP-Stm-LLipP                                      | ULipP-Stm-LLipP              | <b>0.05197</b>  | 0.778           | 0.2358          |
| rs3827760  | 2    | 109513601       | EDAR         | Chin protrusion                                      | angle of Sbn-ULipP-ChiP      | <b>0.06131</b>  | <b>0.09733</b>  | <b>0.01238</b>  |
| rs7559271  | 2    | 223068286       | PAX3         | Nasion                                               | height of Nasion to eyes     | <b>0.005811</b> | 0.117           | <b>0.001986</b> |
| rs17447439 | 3    | 189549423       | TP63         | EyeR-EyeL                                            | LExtCan-RExtCan              | 0.7631          | 0.4777          | 0.9567          |
| rs2045323  | 4    | 154831899       | DCHS2        | Columella inclination/Nose protrusion/Nose tip angle | height of Prn to Ala         | <b>0.05813</b>  | <b>0.04288</b>  | 0.815           |
| rs6184     | 5    | 42719344        | GHR          | mandibular height (ear-Gn)                           | Ear-ChiP                     | <b>0.0915</b>   | 0.2674          | 0.5894          |
| rs1852985  | 6    | 45329656        | SUPT3H/RUNX2 | Nose bridge breadth                                  | LAla-RAla                    | 0.6941          | 0.1894          | 0.244           |
| rs7773292  | 6    | 132099761       | ENPP1        | upper and lower face height                          | Sbn-UlipP-ChiP               | 0.9239          | 0.9781          | 0.9585          |
| rs17640804 | 7    | 42131390        | GLI3         | Nose wing breadth                                    | LAla-RAla                    | 0.1402          | 0.1242          | <b>0.03421</b>  |
| rs805722   | 10   | 105810400       | COL17A1      | EyeLR-Nsn                                            | LIntCan-Nsn-RExtCan          | 0.4636          | 0.3311          | 0.9475          |
|            |      |                 |              |                                                      | angle of LIntCan-Nsn-RExtCan | <b>0.004021</b> | 0.8374          | <b>0.01856</b>  |
| rs927833   | 20   | 22041577        | PAX1         | Nose wing breadth                                    | LAla-RAla                    | 0.4841          | <b>0.007729</b> | <b>0.02703</b>  |

<sup>A</sup>NCBI build 37

<sup>B</sup>original measurements in previous studies
